# Supplementary material for: New World Cactaceae Plants Harbor Diverse Geminiviruses
Source: MDPI journal article supplement (doi:10.3390/v13040694), 2021-04-16
Supplement: s1 [file s1]

| Primers      | Target               | Sequence                           | Annealing Temp. |
|--------------|----------------------|------------------------------------|-----------------|
| OpV1_q_CP_F  | Opuntia virus 1      | 5'-CACTTATGTTAGTATTAGAGGGGAGCTG-3' | 60              |
| OpV1_q_CP_R  |                      | 5'-CTATATCAAACGTATCTCCTCTGACTG-3'  |                 |
| OpV2_q_Rep_F | Opuntia virus 2      | 5'-GGATTTGATGGTAGTGAAAGATTGG-3'    | 58              |
| OpV2_q_Rep_R |                      | 5'-CTCCAAAAAGATTCAGAGTTTCAGC-3'    |                 |
| Bec_q_Rep_F  | Opuntia becurtovirus | 5'-GTAGTGATGTCTTCCTAATGATCTGG-3'   | 56              |
| Bec_q_Rep_R  |                      | 5'-CTAATGATCTGTCTTCTACCAGGAAC-3'   |                 |
