# Supplementary material for: New World Cactaceae Plants Harbor Diverse Geminiviruses
Source: MDPI journal article supplement (doi:10.3390/v13040694), 2021-04-16
Supplement: s1 [file s1]

| Geminivirus                      | Accession # | Motif I | Motif II | GRS                     | Motif III | Walker A     | Walker B | Motif C |
|----------------------------------|-------------|---------|----------|-------------------------|-----------|--------------|----------|---------|
| Spinach curly top Arizona virus  | HQ443515    | FLTYIS  | HTHCIF   | LFFNIILPDGRTIHPRVDGLNAP | YITKE     | GRSPNRLGDSNL | VIDDI    | IGCN    |
| Opuntia becurtovirus ASU PP7     | MT840839    | FLTYIS  | HTHCIF   | LFFNIILPDGRTIHPRVDGLNAP | YITKE     | GRSPNRLGNSNM | VIDDI    | IGCN    |
| Opuntia becurtovirus ASU PP13    | MT840840    | FLTYIS  | HTHCIF   | LFFNIILPDGRIIHPRVDGLNAP | YITKE     | GRSPNRLGNSNM | VIDDI    | IGCN    |
| Opuntia becurtovirus DBG 80      | MT840841    | FLTYIS  | HTHCIF   | LFFNIILPDGRIIHPRVDGLNAP | YITKE     | GRSPNRIGNSNM | VIDDI    | IGCN    |
| Opuntia becurtovirus DBG 86      | MT840842    | FLTYIS  | HTHCIF   | LFFNIILPDGRIIHPRVDGLNAP | YITKE     | GRSPNRIGNSNM | VIDDI    | IGCN    |
| Opuntia becurtovirus DBG 38      | MT840843    | FLTYIS  | HTHCIF   | LFFNIILPDGRIIHPRVDGLNAP | YITKE     | GRSPNRIGNSNL | VIDDI    | IGCN    |
| Opuntia becurtovirus LCM 23      | MT840844    | FLTYIS  | HTHCIF   | LFFNIILPDGRIIHPRVDGLNAP | YITKE     | GRSPNRLGNSNM | VIDDI    | IGCN    |
| Opuntia becurtovirus Martin 2014 | MT840845    | FLTYIS  | HTHCIF   | LFFNIILPDGRIIHPRVDGLNAP | YITKE     | GRSPNRLGNSNM | VIDDI    | IGCN    |
| Opuntia becurtovirus S18 12      | MT840846    | FLTYIS  | HTHCIF   | LFFNIILPDGRIIHPRVDGLNAP | YITKE     | GRSPNRLGNSNM | VIDDI    | IGCN    |
| Opuntia becurtovirus S18 14      | MT840847    | FLTYIS  | HTHCIF   | LFFNIILPDGRVIHPRVDGLNAP | YITKE     | GRSPNRIGNSNL | VIDDI    | IGCN    |
| Opuntia becurtovirus S18 24      | MT840848    | FLTYIS  | HTHCIF   | LFFNIILPDGRIIHPRVDGLNAP | YITKE     | GRSPNRLGNSNM | VIDDI    | IGCN    |
| Opuntia becurtovirus S18 30      | MT840849    | FLTYIS  | HTHCIF   | LFFNIILPDGRIIHPRVDGLNAP | YITKE     | GRSPNRIGNSNL | VIDDI    | IGCN    |
| Opuntia becurtovirus S18 34      | MT840850    | FLTYIS  | HTHCIF   | LFFNIILPDGRIIHPRVDGLNAP | YITKE     | GRSPNRLGNSNM | VIDDI    | IGCN    |
| Opuntia becurtovirus S18 40      | MT840851    | FLTYIS  | HTHYIF   | LFFNIILPDGRVIHPRVDGLNAP | YITKE     | GRSPNRIGNSNL | VIDDI    | IGCN    |
| Opuntia becurtovirus S18 59 1    | MT840852    | FLTYIS  | HTHCIF   | LFFNIILPDGRIIHPRVDGLNAP | YITKE     | GRSPNRLGNSNM | IIDDI    | IGCN    |
| Opuntia becurtovirus S18 69      | MT840853    | FLTYIS  | HTHCIF   | LFFNIILPDGRIIHPRVDGLNAP | YITKE     | GRSPNRIGNSNM | VIDDI    | IGCN    |
| Opuntia becurtovirus S18 71 1    | MT840854    | FLTYIS  | HTHCIF   | LFFNIILPDGRIIHPRVDGLNAP | YITKE     | GRSPNRIGNSNM | VIDDI    | IGCN    |
| Opuntia becurtovirus S18 71 2    | MT840855    | FLTYIS  | HTHCIF   | LFFNIILPDGRIIHPRVDGLNAP | YITKE     | GRSPNRIGNSNM | VIDDI    | IGCN    |
| Opuntia becurtovirus S18 77      | MT840856    | FLTYIS  | HTHCIF   | LFFNIILPDGRTIHPRVDGLNAP | YITKE     | GRSPNRIGNSNL | VIDDI    | IGCN    |
| Opuntia becurtovirus S18 84 1    | MT840857    | FLTYIS  | HTHCIF   | LFFNIILPDGRIIHPRVDGLNAP | YITKE     | GRSPNRLGNSNM | VIDDI    | IGCN    |
| Opuntia becurtovirus S18 84 2    | MT840858    | FLTYIS  | HTHCIF   | LFFNIILPDGRIIHPRVDGLNAP | YITKE     | GRSPNRLGNSNM | VIDDI    | IGCN    |
| Opuntia becurtovirus S18 89 1    | MT840859    | FLTYIS  | HTHCIF   | LFFNIILPDGRVIHPRVDGLNAP | YITKE     | GRSPNRIGNSNL | VIDDI    | IGCN    |
| Opuntia becurtovirus S18 89 2    | MT840860    | FLTYIS  | HTHCIF   | LFFNIILPDGRVIHPRVDGLNAP | YITKE     | GRSPNRIGNSNL | VIDDI    | IGCN    |
| Opuntia becurtovirus S18 100     | MT840861    | FLTYIS  | HTHCIF   | LFFNIILPDGRIIHPRVDGLNAP | YITKE     | GRSPNRIGNSNM | VIDDI    | IGCN    |
| Opuntia becurtovirus S18 101     | MT840862    | FLTYIS  | HTHCIF   | LFFNIILPDGRIIHPRVDGLNAP | YITKE     | GRSPNRIGNSNM | VIDDI    | IGCN    |
| Opuntia becurtovirus S18 54      | MT840863    | FLTYIS  | HTHCIF   | LFFNIILPDGRIIHPRVDGLNAP | YITKE     | GRSPNRIGNSNL | VIDDI    | IGCN    |
| Opuntia becurtovirus S18 56      | MT840864    | FLTYIS  | HTHCIF   | LFFNIILPDGRIIHPRVDGLNAP | YITKE     | GRSPNRLGNSNL | VIDDI    | IGCN    |
| Opuntia becurtovirus S18 59 2    | MT840865    | FLTYIS  | HTHCIF   | LFFNIILPDGRIIHPRVDGLNAP | YITKE     | GRSPNRLGNSNM | IIDDI    | IGCN    |
| Opuntia becurtovirus SI 47       | MT840866    | FLTYIS  | HTHCIF   | LFFNIILPDGRIIHPRVDGLNAP | YITKE     | GRSPNRLGNSNM | VIDDI    | IGCN    |
| Opuntia becurtovirus SI 68       | MT840867    | FLTYIS  | HTHCIF   | LFFNIILPDGRIIHPRVDGLNAP | YITKE     | GRSPNRLGNSNM | VIDDI    | IGCN    |
| Opuntia becurtovirus TM3 2       | MT840868    | FLTYIS  | HTHCIF   | LFFNIILPDGRVIHPRVDGLNAP | YITKE     | GRSPNRLGNSNM | VIDDI    | IGCN    |
| Opuntia becurtovirus UTH RH6     | MT840869    | FLTYIS  | HTHCIF   | LFFNIILPDGRIIHPRVDGLNAP | YITKE     | GRSPNRIGNSNL | VIDDI    | IGCN    |
| Opuntia becurtovirus S18 17      | MT840870    | FLTYIS  | HTHCIF   | LFFNIILPDGRIIHPRVDGLNAP | YITKE     | GRSPNRIGNSNL | VIDDI    | IGCN    |
| Opuntia virus 2 DBG 56           | MT840871    | FLTYT   | HLHILL   | RLFDLVSPTRSAHFHPNIQGAKS | YIDKD     | GRSARGGQQTAN | VIDDV    | WQSN    |
| Opuntia virus 2 DBG 57           | MT840872    | FLTYT   | HLHILL   | RLFDLVSPTRSAHFHPNIQGAKS | YIDKD     | GRSARGGQQTAN | VIDDV    | WQSN    |
| Opuntia virus 2 DBG 61           | MT840873    | FLTYT   | HLHILL   | RLFDLVSPTRSAHFHPNIQGAKS | YIDKD     | GRSARGGQQTAN | VIDDV    | WQSN    |
| Opuntia virus 2 DBG 62           | MT840874    | FLTYT   | HLHILL   | RLFDLVSPTRSAHFHPNIQGAKS | YIDKD     | GRSARGGQQTAN | VIDDV    | WQSN    |
| Opuntia virus 2 DBG 63           | MT840875    | FLTYT   | HLHILL   | RLFDLVSPTRSAHFHPNIQGAKS | YIDKD     | GRSARGGQQTAN | VIDDV    | WQSN    |
| Opuntia virus 2 S18 3 1          | MT840876    | FLTYT   | HLHVLJ   | RLFDLVSPTRSAHFHPNIQGAKS | YIDKD     | GRSARGGCCKAN | VIDDV    | WQSN    |
| Opuntia virus 2 S18 3 2          | MT840877    | FLTYT   | HLHVLJ   | RLFDLVSPTRSAHFHPNIQGAKS | YIDKD     | GRSARGGCCKAN | VIDDV    | WQSN    |
| Opuntia virus 2 S18 3 3          | MT840878    | FLTYT   | HLHVLJ   | RLFDLVSPTRSAHFHPNIQGAKS | YIDKD     | GRSARGGCCKAN | VIDDV    | WQSN    |
| Opuntia virus 2 S18 4 1          | MT840879    | FLTYT   | HLHLIJ   | RLFDLVSPTRSAHFHPNIQGAKS | YIDKD     | GRSARGGSQKAN | VIDDV    | WQSN    |
| Opuntia virus 2 S18 4 2          | MT840880    | FLTYT   | HLHLIJ   | RLFDLVSPTRSAHFHPNIQGAKS | YIDKD     | GRSARGGSQKAN | VIDDV    | WQSN    |
| Opuntia virus 2 S18 4 3          | MT840881    | FLTYT   | HLHLIJ   | RLFDLVSPTRSAHFHPNIQGAKS | YIDKD     | GRSARGGSQKAN | VIDDV    | WQSN    |
| Opuntia virus 2 S18 5 1          | MT840882    | FLTYT   | HLHLIJ   | RLFDLVSPTRSAHFHPNIQGAKS | YIDKD     | GRSARGGSQKAN | VIDDV    | WQSN    |
| Opuntia virus 2 S18 5 2          | MT840883    | FLTYT   | HLHLIJ   | RLFDLVSPTRSAHFHPNIQGAKS | YIDKD     | GRSARGGSQKAN | VIDDV    | WQSN    |
| Opuntia virus 2 S18 8 1          | MT840884    | FLTYT   | HLHLIJ   | RLFDLVSPTRSAHFHPNIQGAKS | YIDKD     | GRSARGGSQKAN | VIDDV    | WQSN    |
| Opuntia virus 2 S18 8 2          | MT840885    | FLTYT   | HLHLIJ   | RLFDLVSPTRSAHFHPNIQGAKS | YIDKD     | GRSARGGSQKAN | VIDDV    | WQSN    |
| Opuntia virus 2 S18 8 3          | MT840886    | FLTYT   | HLHLIJ   | RLFDLVSPTRSAHFHPNIQGAKS | YIDKD     | GRSARGGSQKAN | VIDDV    | WQSN    |
| Opuntia virus 2 S18 8 4          | MT840887    | FLTYT   | HLHLIJ   | RLFDLVSPTRSAHFHPNIQGAKS | YINKD     | GRSARGGSQKAN | VIDDV    | WQSN    |
| Opuntia virus 2 S18 12 1         | MT840888    | FLTYT   | HLHVLJ   | RLFDLVSPTRSAHFHPNIQGAKS | YIDKD     | GRSARGGCQKAN | VIDDV    | WQSN    |
| Opuntia virus 2 S18 12 2         | MT840889    | FLTYT   | HLHVLJ   | RLFDLVSPTRSAHFHPNIQGAKS | YIDKD     | GRSARGGCQKAN | VIDDV    | WQSN    |
| Opuntia virus 2 S18 14           | MT840890    | FLTYT   | HLHVLJ   | RLFDLVSPTRSAHFHPNIQGAKS | YIDKD     | GRSARGGSQKAN | VIDDV    | WQSN    |
| Opuntia virus 2 S18 25 1         | MT840891    | FLTYT   | HLHVLJ   | RLFDLVSPTRSAHFHPNIQGAKS | YIDKD     | GRSARGGCQKAN | VIDDV    | WQSN    |
| Opuntia virus 2 S18 25 2         | MT840892    | FLTYT   | HLHVLJ   | RLFDLVSPTRSAHFHPNIQGAKS | YIDKD     | GRSARGGCQKAN | VIDDV    | WQSN    |
| Opuntia virus 2 S18 26 1         | MT840893    | FLTYT   | HLHVLJ   | RLFDLVSPTRSAHFHPNIQGAKS | YIDKD     | GRSARGGCQKAN | VIDDI    | WQSN    |
| Opuntia virus 2 S18 26 2         | MT840894    | FLTYT   | HLHVLJ   | RLFDLVSPTRSAHFHPNIQGAKS | YIDKD     | GRSARGGCQKAN | VIDDV    | WQSN    |
| Opuntia virus 2 S18 26 3         | MT840895    | FLTYT   | HLHVLJ   | RLFDLVSPTRSAHFHPNIQGAKS | YIDKD     | GRSARGGCQKAN | VIDDI    | WQSN    |
| Opuntia virus 2 S18 27           | MT840896    | FLTYT   | HLHVLJ   | RLFDLVSPTRSAHFHPNIQGAKS | YIDKD     | GRSARGGCQKAN | VIDDV    | WQSN    |
| Opuntia virus 2 S18 40 1         | MT840897    | FLTYT   | HLHILL   | RLFDLVSPTRSAHFHPNIQGAKS | YIDKD     | GRSARGGQQTAN | VIDDV    | WQSN    |
| Opuntia virus 2 S18 40 2         | MT840898    | FLTYT   | HLHVLJ   | RLFDLVSPTRSAHFHPNIQGAKS | YIDKD     | GRSARGGSQKAN | VIDDV    | WQSN    |
| Opuntia virus 2 S18 40 3         | MT840899    | FLTYT   | HLHILL   | RLFDLVSPTRSAHFHPNIQGAKS | YIDKD     | GRSARGGQQTAN | VIDDV    | WQSN    |
| Opuntia virus 2 S18 41 1         | MT840900    | FLTYT   | HLHILL   | RLFDLVSPTRSAHFHPNIQGAKS | YIDKD     | GRSARGGQQTAN | VIDDV    | WQSN    |
| Opuntia virus 2 S18 41 2         | MT840901    | FLTYT   | HLHILL   | RLFDLVSPTRSAHFHPNIQGAKS | YIDKD     | GRSARGGQQTAN | VIDDV    | WQSN    |
| Opuntia virus 2 S18 75 1         | MT840902    | FITYT   | HLHVLJ   | RLFDLVSPTRSTHFHPNIQGAKS | YIDKD     | GRSARGGCQKAN | VIDDV    | WQSN    |
| Opuntia virus 2 S18 75 2         | MT840903    | FITYT   | HLHVLJ   | RLFDLVSPTRSTHFHPNIQGAKS | YIDKD     | GRSARGGCQKAN | VIDDV    | WQSN    |
| Opuntia virus 2 S18 75 3         | MT840904    | FITYT   | HLHVLJ   | RLFDLVSPTRSAHFHPNIQGAKS | YIDKD     | GRSARGGCQKAN | VIDDV    | WQSN    |
| Opuntia virus 2 S18 75 4         | MT840905    | FLTYT   | HLHVLJ   | RLFDLVSPTRSAHFHPNIQGAKS | YIDKD     | GRSARGGQQTAN | VIDDV    | WQSN    |
| Opuntia virus 2 SI 63 1          | MT840906    | FLTYT   | HLHVLJ   | RLFDLVSPTRSAHFHPNIQGAKS | YIDKD     | GRSARGGCCKAN | VIDDV    | WQSN    |
| Opuntia virus 2 SI 63 2          | MT840907    | FLTYT   | HLHVLJ   | RLFDLVSPTRSAHFHPNIQGAKS | YIDKD     | GRSARGGCQKAN | VIDDV    | WQSN    |
| Opuntia virus 2 SI 64            | MT840908    | FLTYT   | HLHVLJ   | RLFDLVSPTRSAHFHPNIQGAKS | YIDKD     | GRSARGGCCKAN | VIDDV    | WQSN    |
| Opuntia virus 2 SI 70            | MT840909    | FLTYT   | HLHVLJ   | RLFDLVSPTRSAHFHPNIQGAKS | YIDKD     | GRSARGGSQKAN | VIDDV    | WQSN    |
| Opuntia virus 2 TM cacti 3 1     | MT840910    | FITYT   | HLHVLJ   | RLFDLVSPTRSAHFHPNIQGAKS | YIDKD     | GRSARGGCQKAN | VIDDV    | WQSN    |
| Opuntia virus 2 TM cacti 3 2     | MT840911    | FITYT   | HLHVLJ   | RLFDLVSPTRSAHFHPNIQGAKS | YIDKD     | GRSARGGCQKAN | VIDDV    | WQSN    |
| Opuntia virus 2 UTH RH4          | MT840912    | FLTYT   | HLHILL   | RLFDLVSPTRSAHFHPNIQGAKS | YIDKD     | GRSARGGQQTAN | VIDDV    | WQSN    |
