# Supplementary figures and images for: New World Cactaceae Plants Harbor Diverse Geminiviruses
Source: MDPI journal article supplement (doi:10.3390/v13040694), 2021-04-16

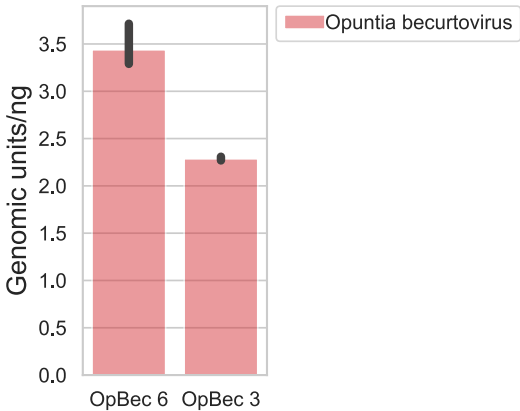

Supplement: s1 [file s1]

A

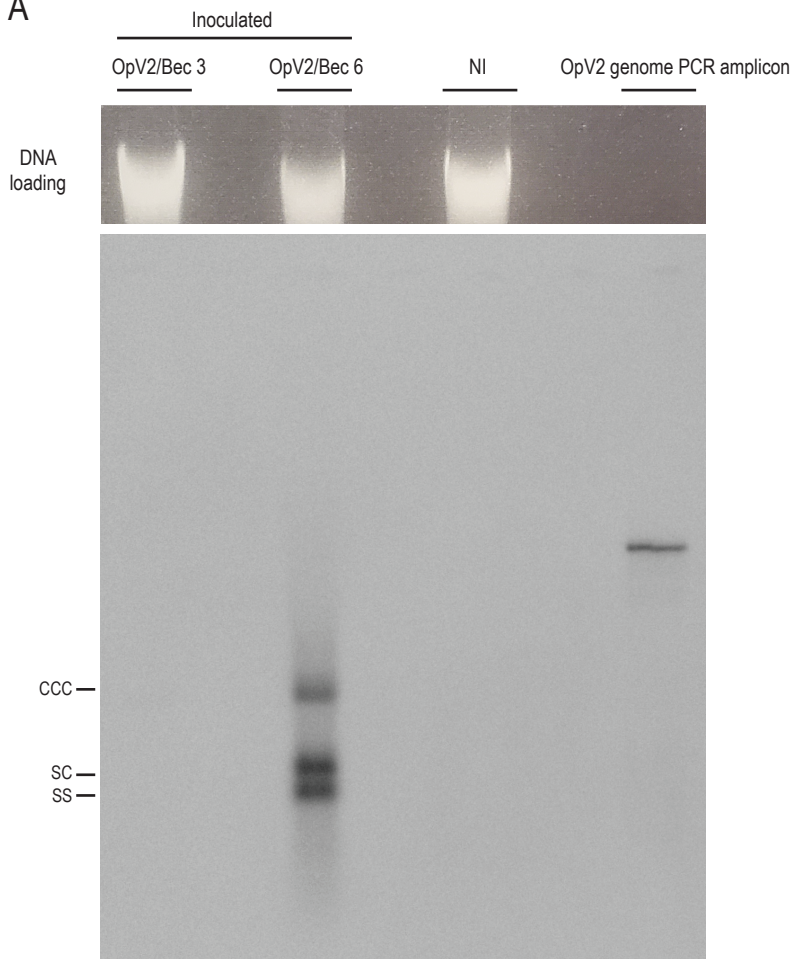

B

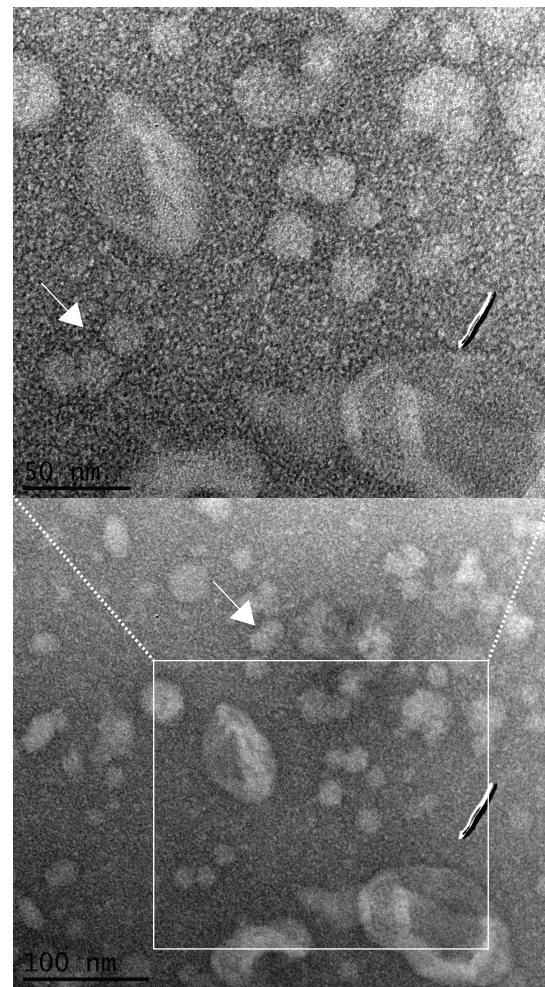

Supplement: s1 [file s1]
